# Supplementary material for: The Candidate Splicing Factor Sfswap Regulates Growth and Patterning of Inner Ear Sensory Organs
Source: PubMed Central journal article supplement (PMC3879212; doi:10.1371/journal.pgen.1004055), 2014-01-02
Supplement: pgen.1004055.s005.pdf [file pgen.1004055.s005.pdf]

**Table S1. RT-PCR primers for *Notch1*, *Delta1*, and *Jagged1***

| Gene          | Exons Detected | Forward               | Reverse                 |
|---------------|----------------|-----------------------|-------------------------|
| <i>Sfswap</i> | 3-5            | GCGGAGGATGGAACTACAG   | CTTGGCCTTCAGCATGATCT    |
| <i>Jag1</i>   | 1-5            | CCCCCTGAGTCTTCTGCTC   | AGGGTTTATCATGCCTGAGTG   |
|               | 3-7            | GCCTGGGATTCCAGTAATGA  | TGATGAGTCCCACAGTAATTCAG |
|               | 6-11           | CAGTGCCTCTGTGAGACCAAC | AGGAGGCGTCATTCTGACACT   |
|               | 10-14          | CTGGATGGGTGAGAAGTGTG  | GATATACCGCACCCCTTCAG    |
|               | 13-18          | AAAGACCACTGCCGTACCAC  | GGCAGGCAGCTACTGTTTCTA   |
|               | 17-21          | CTGGGAAGGAACAACCTGTAA | AGCCATTGATCTCATCCACAC   |
|               | 20-25          | GGGCCAGACTGCAGGATAA   | CTTGACAGGGTCCCATCAT     |
|               | 23-26          | GGTCTGGATGACCAGTGTT   | CCGCTTCCTTACACACCAGT    |
|               | 25-26          | GGGAACCCTGTCAAGGAAAT  | GGGATGCTTCCAACCTCACA    |
| <i>Notch1</i> | 1-4            | CAGGAAAGAGGGGCATCAGAG | GGCAGCGACAGATGTATGAA    |
|               | 8-13           | CAGATTGGGGAGTTCCAATG  | CAATGTTGACGTTACACATGCTT |
|               | 12-16          | GCTACGAATGTGCCTGTGAA  | TGTGGGACAGACACAGGAAA    |
|               | 15-19          | GACCTGCATTGATGATGTCG  | CAGGTGGACACAGACAGGTG    |
|               | 18-21          | GCCAATTGCACTGACTGTGT  | GGGTTAGGTGAGCACTCGTC    |
|               | 20-23          | GACGTGCTCAGTGTGTCCTG  | ACACAGGTGCCATTGTTGAA    |
|               | 22-25          | GGGGTACCTGCATTGATCTG  | TCACAGGTGCCCTGATTGTA    |
|               | 24-26          | CAAGAATGGGGGTGTCTGTG  | TGGTCCTTGCACTACTGGTC    |
|               | 25-27          | ACTGTGACAGCCAGTGCAAC  | CGGCCTCAATCTTGTAAAGGA   |
|               | 26-30          | ACTATGGCCACGAGGAAGAG  | CAGGGAGAACTACTGGCTCCT   |
|               | 29-31          | AATGCCTCAGATGGTGCTCT  | CACTGTTGCCTGTCTCAAGG    |
| <i>Delta1</i> | 1-4            | TCCCTGGGTCTTTGAAGAAG  | GTGCTCGTCACACAAAACC     |
|               | 3-7            | CAGACTCTCCCGATGACCTC  | GGGCTAGGAGCACACTCATC    |
|               | 6-9            | TCCGATACCCAGGTTGTCTC  | GGCAGGTACAGGAGAAGTCG    |
|               | 9-11           | CAACAAGAAGGCGGACTTTC  | TCCTCTCTCAGCAGCATTCA    |
|               | 8-10           | TAACCCTGACGGAGGCTACA  | TCTGGCCTTTTTCTGTCAGG    |
