# Supplementary material for: The Candidate Splicing Factor Sfswap Regulates Growth and Patterning of Inner Ear Sensory Organs
Source: PubMed Central journal article supplement (PMC3879212; doi:10.1371/journal.pgen.1004055), 2014-01-02
Supplement: pgen.1004055.s006.pdf [file pgen.1004055.s006.pdf]

**Table S2. RT PCR primers for Notch signaling targets and modifiers.**

| Gene          | Exons Detected        | Forward                  | Reverse                 |
|---------------|-----------------------|--------------------------|-------------------------|
| <i>Hey1</i>   | All                   | CCCAGACTACAGCTCCTCAGA    | ATGCTCAGATAACGGGCAAC    |
| <i>Hey2</i>   | All                   | ATGAAGCGCCCTTGTGAG       | AGCCACTTCTGTCAAGCACTC   |
| <i>Hes5</i>   | All                   | ATGCTCAGTCCCAAGGAGAA     | AGCAGCTTCATCTGCGTGT     |
| <i>Hes1</i>   | All                   | AAACGAAAATGCCAGCTGAT     | GTCACCTCGTTCATGCACTC    |
| <i>HeyL</i>   | All                   | TGTGGGTCAAGAGAACGATCTTA  | CCCCAGGTATCTTATGACCTCAG |
| <i>Lfng</i>   | 1-6                   | CTGCTGTTTCGAGACCTGGAT    | CAATGTAGCCAATGGTGCAG    |
|               | 4-8                   | AGCTATCCCCACACCCAAG      | TACAGGTGGCAATGGACAGA    |
| <i>Mfng</i>   | All                   | GTCTCCAGGATCAGGCAACA     | CTGGGTAGAGGAGACAATGGA   |
|               | processed transcript  | GCTTTCCTGTCGTCTTGCTC     | GCTCTGCAGAACAGTTGGTG    |
|               | 4-7 (retained intron) | TTCCTGACAGCCCAGATGA      | GCACCATCTTCAAAGCCAGT    |
|               | 5-7 (retained intron) | GAACGCCTCCAGGAGAGACT     | GGTGGCTAGGAGTTTGGTCA    |
| <i>Neur1a</i> | 1-3 (201)             | CAGATCACAAAGGAACACTATCCA | CACAGGCTCACCGACAGG      |
|               | 2-5                   | GACGTCTACGGCCTCACG       | AGGTGAGTTGGGGGCTGT      |
|               | 1-3 (202)             | ACTTCTCCAGTGTCTCCTCTCTG  | GCACAGGCTCACCGACAG      |
|               | 1-2 (201)             | GAAGGAGGAGGGGAAGTGG      | TTCAGCCTGACTTGCTCGTA    |
|               | 2-3                   | GCTCTTCCATCCCCACACTA     | GACCCCACTGAAGAAAAGCA    |
|               | 3-4                   | AGCATTGCCTGAGGAGTTTG     | GGCTGTGCTGAGAATTGAGC    |
|               | 4-5                   | GAGCTGCACCTGAGTCACAA     | GACTGTGTCCACTGCGTGTT    |
|               | 1-2 (202)             | GCACACACTTGACACCTTT      | GAGGATCTGGGAGCCCTTAG    |
| <i>MamlD1</i> | 3-6                   | TGATTCTATGCCTGCTCTGC     | ATCTTTTGCTGGTTGGATGG    |
| <i>Maml2</i>  | All                   | TTATCAAGCCAGCCTTTGCT     | TGAGGCTGGAGTTTGGAGTT    |
| <i>Maml3</i>  | 2-5                   | AACGCATGCTTCTCATTAAAGC   | AGCCACCTGGTTTCTCACAG    |
| <i>Maml1</i>  | 2-5                   | TCAGAACCCCGTGAATAACC     | GAGGACAGCTGGAGTTGGAC    |
| <i>Numb</i>   | 2-8                   | GGCGGAGGTAGAGTCTGAGG     | GGCCTTCACTGCTTTCTTTC    |
|               | 7-11                  | CAGTTGCAAGATGCCAAGAA     | GAGAGGCAGCACCCAGAAGAC   |
| <i>Numbl</i>  | 1-6                   | CACAGCAGCAGCAGCACT       | CAGGAGCACAGAAGGAGACC    |
|               | Retained intron       | CACAGCAGCAGCAGCACT       | TGGAATCGGCTCAGTTAAGG    |
| <i>Rbpj</i>   | 1 (202)-4             | ACTCGAGGCGTCTGCTTAAC     | CCAACCACTGCCCATAAGAT    |
|               | 1 (201)-4             | GGACTACTCGGAGGGCTTGT     | CCAACCACTGCCCATAAGAT    |
|               | 1 (203)-4             | TGGAGTTTTGGCGAGAGTTT     | CCAACCACTGCCCATAAGAT    |
|               | 3-7                   | AACGAGGGGATCAAACAGTG     | CTGCCCGTAATGGATGTAGC    |
|               | 6-11                  | GAATTTCCACGCCAGTTCAC     | GCAGAAATGTCTGGGACCAC    |
